# Supplementary material
Source: MDPI journal article supplement (https://www.mdpi.com/2071-1050/11/16/4291)
Supplement: s1 [file s1]

# ShoeLab Model Validation

Please answer the following questions based on the provided Shoe manufacturing As-Is model and ShoeLab case study model. Rate the ShoeLab model according to its ability to convey the facts proposed by each statement, the As-Is model is provided for reference only.

\* Required

## Transportation

1. Production and retail are carried out in vicinity to the customer \*

Mark only one oval.

|           |                       |                       |                       |                       |                       |            |
|-----------|-----------------------|-----------------------|-----------------------|-----------------------|-----------------------|------------|
|           | 1                     | 2                     | 3                     | 4                     | 5                     |            |
| Not clear | <input type="radio"/> | Very clear |

2. Only raw materials travel long distances \*

Mark only one oval.

|           |                       |                       |                       |                       |                       |            |
|-----------|-----------------------|-----------------------|-----------------------|-----------------------|-----------------------|------------|
|           | 1                     | 2                     | 3                     | 4                     | 5                     |            |
| Not clear | <input type="radio"/> | Very clear |

3. Manufacturing and retail happen in the same place \*

Mark only one oval.

|           |                       |                       |                       |                       |                       |            |
|-----------|-----------------------|-----------------------|-----------------------|-----------------------|-----------------------|------------|
|           | 1                     | 2                     | 3                     | 4                     | 5                     |            |
| Not clear | <input type="radio"/> | Very clear |

4. Data is used to determine where the closest manufacturing/service centre is in relation to the customer \*

Mark only one oval.

|           |                       |                       |                       |                       |                       |            |
|-----------|-----------------------|-----------------------|-----------------------|-----------------------|-----------------------|------------|
|           | 1                     | 2                     | 3                     | 4                     | 5                     |            |
| Not clear | <input type="radio"/> | Very clear |

5. Reliance on long transportation distances for raw materials, components, finished products and services is minimised in comparison to the As-Is model \*

Mark only one oval.

|           |                       |                       |                       |                       |                       |            |
|-----------|-----------------------|-----------------------|-----------------------|-----------------------|-----------------------|------------|
|           | 1                     | 2                     | 3                     | 4                     | 5                     |            |
| Not clear | <input type="radio"/> | Very clear |



**12. Comments or feedback on the Customer Involvement section:**

---

---

---

---

---

## Circularity

**13. A worn or damaged product can be used as raw material \***

*Mark only one oval.*

|           | 1                     | 2                     | 3                     | 4                     | 5                     |            |
|-----------|-----------------------|-----------------------|-----------------------|-----------------------|-----------------------|------------|
| Not clear | <input type="radio"/> | Very clear |

**14. Reparability and modularity are features of the product \***

*Mark only one oval.*

|           | 1                     | 2                     | 3                     | 4                     | 5                     |            |
|-----------|-----------------------|-----------------------|-----------------------|-----------------------|-----------------------|------------|
| Not clear | <input type="radio"/> | Very clear |

**15. During the disposal stage the worn product can be taken back by the manufacturer \***

*Mark only one oval.*

|           | 1                     | 2                     | 3                     | 4                     | 5                     |            |
|-----------|-----------------------|-----------------------|-----------------------|-----------------------|-----------------------|------------|
| Not clear | <input type="radio"/> | Very clear |

**16. The product's materials have a reusable life cycle \***

*Mark only one oval.*

|           | 1                     | 2                     | 3                     | 4                     | 5                     |            |
|-----------|-----------------------|-----------------------|-----------------------|-----------------------|-----------------------|------------|
| Not clear | <input type="radio"/> | Very clear |

**17. Comments or feedback on the Circularity section:**

---

---

---

---

---

## Services
